# Supplementary material for: Impact of adoption of heat-stress tolerant maize hybrid on yield and profitability: Evidence from Terai region of Nepal
Source: Frontiers journal article supplement (doi:10.3389/fsufs.2023.1101717), 2023-04-03
Supplement: Table_1.pdf [file Table_1.pdf]

## Supplementary file

**Table S1.** Treatment effect estimation of IPWRA model

| Variables                                                                  | OME1      |            | OME0     |           |
|----------------------------------------------------------------------------|-----------|------------|----------|-----------|
|                                                                            | Coef.     | Robust SE. | Coef.    | Robust SE |
| Gender of household head (M=1, F=0)                                        | 2.632     | 3.155      | 3.336    | 3.790     |
| Age of household head (years)                                              | -0.596    | 0.657      | -0.040   | 0.434     |
| Square of Age of household head                                            | 0.004     | 0.006      | 0.001    | 0.004     |
| Years of education (years)                                                 | 0.012     | 0.262      | 0.278    | 0.271     |
| Caste (Brahmin/Chhatri=1)                                                  | 1.262     | 2.765      | -6.483** | 3.048     |
| Per capita per person landholding (ha)                                     | -0.552    | 3.830      | -1.425   | 10.723    |
| Proportionate of maize area (%)                                            | -0.018*   | 0.011      | 0.005    | 0.006     |
| Major source of agriculture information (agriculture extension offices =1) | 3.971     | 3.543      | 2.396    | 3.209     |
| Major source of agriculture information (co-operative=1)                   | 4.293*    | 2.233      | 7.746*** | 2.688     |
| Major source of agriculture information (agrovet=1)                        | -0.309    | 3.199      | 1.121    | 2.210     |
| Number of members migrated                                                 | 2.767**   | 1.322      | 2.297*   | 1.379     |
| Own she buffalo (yes=1)                                                    | -0.623    | 1.852      | -2.445   | 2.113     |
| Own sheep & goat (yes=1)                                                   | 1.630     | 2.996      | -5.523** | 2.458     |
| Household size                                                             | -0.142    | 0.226      | 0.586*   | 0.347     |
| Soil level of maize plot                                                   | 0.451     | 2.881      | -5.041*  | 2.958     |
| Winter season                                                              | 11.996*** | 2.338      | 6.804*** | 2.493     |
| Soil depth of maize plot (cm)                                              | 0.208*    | 0.130      | -0.129   | 0.129     |
| Log per capita per day income (NPR)                                        | 3.534     | 2.665      | -0.394   | 2.830     |
| Income allows to build income                                              | -0.516    | 4.433      | -1.427   | 5.330     |
| Income=expenses                                                            | -2.669    | 4.053      | -0.370   | 5.449     |
| Sowing by tractor                                                          | 4.226     | 3.274      | 0.521    | 2.712     |
| Source of seed purchased (co-operative=1)                                  | -0.721    | 1.940      | -5.662** | 2.434     |
| Years of hybrid maize cultivation                                          | 1.016**   | 0.497      | 1.994*** | 0.370     |
| District (Dang=1)                                                          | -1.031    | 2.855      | -6.014*  | 3.269     |
| Distance to input dealer (km)                                              | -0.619**  | 0.284      | 0.276    | 0.298     |
| Distance to extension offices (km)                                         | 0.688**   | 0.294      | 0.577**  | 0.265     |
| Number of irrigations                                                      | 0.859     | 0.597      | 1.352*** | 0.439     |
| Constant                                                                   | 32.065    | 20.392     | 29.801** | 14.548    |
| TME1                                                                       |           |            |          |           |
| Major source of agriculture information (agriculture extension offices =1) | 1.246***  | 0.402      |          |           |
| Major source of agriculture information (co-operative=1)                   | 0.780**   | 0.361      |          |           |
| Major source of agriculture information (agrovet=1)                        | -0.303    | 0.313      |          |           |
| Source of seed purchased (co-operative=1)                                  | 2.531***  | 0.268      |          |           |
| Constant                                                                   | -1.624*** | 0.256      |          |           |

Note: a) ATE = Average Treatment Effect; OME 1 & OME 0 = Outcome models in different treatment levels; TME1 = Treatment model; b) \*\*\*, \*\* and\* refer significance at 1 per cent, 5 per cent and 10 per cent levels respectively.

**Table S2.** SWOT analysis of RH-10 hybrid

| <b>Strength</b>                                                                                                                                                                                                                                                                                                                                                                                                                                                                                                                                                                                                                                                                       | <b>Weakness</b>                                                                                                                                                                             |
|---------------------------------------------------------------------------------------------------------------------------------------------------------------------------------------------------------------------------------------------------------------------------------------------------------------------------------------------------------------------------------------------------------------------------------------------------------------------------------------------------------------------------------------------------------------------------------------------------------------------------------------------------------------------------------------|---------------------------------------------------------------------------------------------------------------------------------------------------------------------------------------------|
| <ul style="list-style-type: none"><li>➤ RH-10 is a single cross hybrid and heat-tolerant maize hybrid</li><li>➤ Seed produced and deployed by local seed companies</li><li>➤ Suitable for local cropping pattern</li><li>➤ Local seed production can enable the seed price advantage</li><li>➤ Yield advantage in stress conditions and at par in optimal condition</li><li>➤ Strong linkages between government agriculture extension activities/ PMAMP/co-operative societies for seed marketing</li><li>➤ Recommended for both (rainy and spring) seasons</li><li>➤ Capture considerable market share in spring season</li><li>➤ Stay green character gives green fodder</li></ul> | <ul style="list-style-type: none"><li>➤ Local seed companies need technical support for quality hybrid seed production</li><li>➤ Seed production is not as per the demand</li></ul>         |
| <b>Opportunity</b>                                                                                                                                                                                                                                                                                                                                                                                                                                                                                                                                                                                                                                                                    | <b>Threats</b>                                                                                                                                                                              |
| <ul style="list-style-type: none"><li>➤ High opportunity to capture considerable share in maize seed market in Nepal</li><li>➤ Boost the local seed industry</li><li>➤ Employment generation to contract seed farmers and labors</li><li>➤ Better earning to seed producer farmers</li><li>➤ Scope to increase the area under RH-10</li><li>➤ Reduces the seed expenses of maize farmers</li><li>➤ Minimize the dependency on Indian hybrids</li><li>➤ Increase collaboration between seed companies-extension agencies - co-operatives-farmers</li></ul>                                                                                                                             | <ul style="list-style-type: none"><li>➤ Demand may affect if seed quality standards are not met as per market</li><li>➤ Introduction to a better alternative hybrid in the market</li></ul> |
